# Supplementary material for: Uterine Microbiota and Immune Parameters Associated with Fever in Dairy Cows with Metritis
Source: PubMed Central journal article supplement (PMC5089738; doi:10.1371/journal.pone.0165740), 2016-11-01
Supplement: pone.0165740.s002.pdf [file pone.0165740.s002.pdf]

## S2 Text Metabolic state

To find whether fever was associated with an impaired metabolic state, serum total calcium and serum NEFA concentrations were evaluated in 202 cows within 4 DPP (S3 Fig). Serum total calcium concentration was similar among groups at 0 DPP, but cows with metritis dropped significantly at 2 DPP. The MNoFever and MFever had lower ( $P < 0.01$ ) serum total calcium concentration than the Healthy group at 2 DPP ( $7.9 \pm 0.2$  vs.  $8.1 \pm 0.1$  vs.  $8.5 \pm 0.1$  mg/dL) and 4 DPP ( $8.3 \pm 0.2$  vs.  $8.2 \pm 0.1$  vs.  $8.9 \pm 0.1$  mg/dL). On the other hand, the concentration of NEFA tended to be higher ( $P < 0.1$ ) in the MNoFever and MFever groups than in the Healthy group ( $803.3 \pm 73.9$  vs.  $801.0 \pm 73.2$  vs.  $657.7 \pm 45.5$   $\mu$ Eq/L). Both metabolites showed no difference between the MNoFever and MFever groups. These data indicate that metabolic state was associated with the development of metritis, but it was not related to a fever.
