# Supplementary material for: Uterine Microbiota and Immune Parameters Associated with Fever in Dairy Cows with Metritis
Source: PubMed Central journal article supplement (PMC5089738; doi:10.1371/journal.pone.0165740), 2016-11-01
Supplement: pone.0165740.s007.pdf [file pone.0165740.s007.pdf]

**S1 Table. Overview of cows and samples used in the study.**

|                             | Study 1             | Study 2         |                         | Study 1 and Study 2 |
|-----------------------------|---------------------|-----------------|-------------------------|---------------------|
| Purpose                     | Uterine microbiota  | Immune function |                         | Metabolic state     |
| No. of cows enrolled        | 92                  | 110             |                         | 202                 |
| Day of sampling*            | 6 ± 2 DPP           | 0 and 3 DPP     |                         | 0, 2, and 4 DPP     |
| No. of samples for analysis | Metagenomics, ddPCR | PMN activity    | TNF $\alpha$ , PGE $_2$ | Ca, NEFA            |
| Healthy                     | 11                  | 58              | 14                      | 98                  |
| MNoFever                    | 12                  | 19              | 14                      | 48                  |
| MFever                      | 11                  | 33              | 14                      | 56                  |

\* Samples for Study 1 were collected at the day of disease diagnosis and samples for Study 2 were collected before disease onset. DPP = days postpartum.
