# Supplementary material for: Uterine Microbiota and Immune Parameters Associated with Fever in Dairy Cows with Metritis
Source: PubMed Central journal article supplement (PMC5089738; doi:10.1371/journal.pone.0165740), 2016-11-01
Supplement: pone.0165740.s008.pdf [file pone.0165740.s008.pdf]

**S2 Table. Metadata for study 1 and study 2.** These risk factors were included as the variable in the GLM and MIXED models.

| n (%)                    | Healthy  |           | MNoFever  |           | MFever   |           |
|--------------------------|----------|-----------|-----------|-----------|----------|-----------|
|                          | Study 1  | Study 2   | Study 1   | Study 2   | Study 1  | Study 2   |
| Parity                   |          |           |           |           |          |           |
| Primiparous              | 4 (36.4) | 14 (24.1) | 2 (16.7)  | 8 (42.1)  | 7 (63.6) | 14 (42.4) |
| Multiparous              | 7 (63.6) | 44 (75.9) | 10 (83.3) | 11 (57.9) | 4 (36.4) | 19 (57.6) |
| Dystocia                 | 1 (9.1)  | 12 (20.7) | 6 (50.0)  | 8 (42.1)  | 3 (27.3) | 14 (42.4) |
| Twins                    | 0 (0.0)  | 3 (5.2)   | 0 (0.0)   | 2 (10.5)  | 0 (0.0)  | 8 (24.2)  |
| Stillbirth               | 0 (0.0)  | 3 (5.2)   | 0 (0.0)   | 1 (5.3)   | 2 (18.2) | 3 (9.1)   |
| Retained placenta        | 0 (0.0)  | 3 (5.2)   | 1 (8.3)   | 3 (15.8)  | 2 (18.2) | 10 (30.3) |
| Subclinical hypocalcemia | 4 (36.0) | 26 (44.8) | 9 (75.0)  | 14 (73.7) | 6 (54.5) | 32 (97.0) |
