# Supplementary material for: Uterine Microbiota and Immune Parameters Associated with Fever in Dairy Cows with Metritis
Source: PubMed Central journal article supplement (PMC5089738; doi:10.1371/journal.pone.0165740), 2016-11-01
Supplement: pone.0165740.s009.pdf [file pone.0165740.s009.pdf]

**S3 Table. MG-RAST IDs.**

| <b>Sample No.</b> | <b>Animal No.</b> | <b>Study group</b> | <b>Days postpartum</b> | <b>MG-RAST ID</b> |
|-------------------|-------------------|--------------------|------------------------|-------------------|
| SJ18              | 12437             | MFever             | 8                      | 4584525           |
| SJ21              | 12517             | MFever             | 4                      | 4584526           |
| SJ24              | 12375             | MFever             | 6                      | 4584527           |
| SJ27              | 10955             | MFever             | 8                      | 4584528           |
| SJ30              | 12258             | MFever             | 6                      | 4584529           |
| SJ69              | 12484             | MFever             | 4                      | 4584542           |
| SJ75              | 12279             | MFever             | 6                      | 4584544           |
| SJ78              | 13302             | MFever             | 8                      | 4584545           |
| SJ81              | 28679             | MFever             | 8                      | 4584546           |
| SJ84              | 202               | MFever             | 8                      | 4584547           |
| SJ87              | 9685              | MFever             | 6                      | 4584548           |
| SJ33              | 14918             | MNoFever           | 6                      | 4584530           |
| SJ36              | 4512              | MNoFever           | 4                      | 4584531           |
| SJ39              | 9089              | MNoFever           | 6                      | 4584532           |
| SJ42              | 13776             | MNoFever           | 6                      | 4584534           |
| SJ45              | 8277              | MNoFever           | 6                      | 4584535           |
| SJ88              | 9333              | MNoFever           | 4                      | 4584549           |
| SJ89              | 10212             | MNoFever           | 4                      | 4584550           |
| SJ90              | 2688              | MNoFever           | 6                      | 4584551           |
| SJ91              | 438               | MNoFever           | 8                      | 4584552           |
| SJ92              | 12414             | MNoFever           | 6                      | 4584553           |
| SJ93              | 19328             | MNoFever           | 6                      | 4584554           |
| SJ94              | 4853              | MNoFever           | 8                      | 4584555           |
| SJ3               | 9854              | Healthy            | 8                      | 4584533           |
| SJ6               | 8085              | Healthy            | 4                      | 4584543           |
| SJ9               | 15527             | Healthy            | 6                      | 4584556           |
| SJ12              | 265               | Healthy            | 8                      | 4584523           |
| SJ15              | 16018             | Healthy            | 6                      | 4584524           |
| SJ48              | 10514             | Healthy            | 4                      | 4584536           |
| SJ54              | 6870              | Healthy            | 6                      | 4584537           |
| SJ57              | 246               | Healthy            | 8                      | 4584538           |
| SJ60              | 9284              | Healthy            | 8                      | 4584539           |
| SJ63              | 12265             | Healthy            | 6                      | 4584540           |
| SJ66              | 10991             | Healthy            | 8                      | 4584541           |
