# Supplementary material for: Uterine Microbiota and Immune Parameters Associated with Fever in Dairy Cows with Metritis
Source: PubMed Central journal article supplement (PMC5089738; doi:10.1371/journal.pone.0165740), 2016-11-01
Supplement: pone.0165740.s010.pdf [file pone.0165740.s010.pdf]

**S4 Table. Relative abundance of the 35 most abundant species.**

| Species                               | Relative abundance (%) |                          |                           |                         |
|---------------------------------------|------------------------|--------------------------|---------------------------|-------------------------|
|                                       | All                    | Healthy                  | MNoFever                  | MFever                  |
| <i>Fusobacterium necrophorum</i>      | 18.1                   | 15.8                     | 18.2                      | 20.3                    |
| <i>Bacteroides heparinolyticus</i>    | 14.9                   | <b>7.0<sup>a,A</sup></b> | <b>20.3<sup>b</sup></b>   | 16.8 <sup>B</sup>       |
| <i>Porphyromonas levii</i>            | 13.0                   | 9.4                      | 17.7                      | 11.4                    |
| <i>Sneathia sanguinegens</i>          | 6.2                    | 10.6 <sup>A</sup>        | 6.6 <sup>A,B</sup>        | 1.5 <sup>B</sup>        |
| <i>Bacteroides pyogenes</i>           | 5.9                    | <b>4.0<sup>a</sup></b>   | <b>3.9<sup>a</sup></b>    | <b>10.0<sup>b</sup></b> |
| <i>Helcococcus ovis</i>               | 5.0                    | 4.6                      | 2.2                       | 8.6                     |
| <i>Fusobacterium gonidiaformans</i>   | 4.2                    | 1.7                      | 6.3                       | 4.4                     |
| <i>Ureaplasma diversum</i>            | 2.4                    | 7.2                      | 0.1                       | 0.1                     |
| <i>Gallibacterium melopsittaci</i>    | 2.0                    | 1.7                      | 3.4                       | 0.9                     |
| <i>Streptococcus uberis</i>           | 1.8                    | 1.7                      | 3.2                       | 0.4                     |
| <i>Filifactor villosus</i>            | 1.6                    | <b>0.9<sup>a</sup></b>   | <b>2.3<sup>b</sup></b>    | 1.7 <sup>a,b</sup>      |
| <i>Porphyromonas cansulci</i>         | 1.6                    | 0.02                     | 0.9                       | 4.0                     |
| <i>Bacteroides denticanum</i>         | 1.6                    | 1.4                      | 1.3                       | 2.1                     |
| <i>Porphyromonas asaccharolytica</i>  | 1.3                    | 0.5                      | 0.8                       | 2.6                     |
| <i>Serratia entomophila</i>           | 1.1                    | 3.3                      | 0.03                      | 0.02                    |
| <i>Mycoplasma californicum</i>        | 1.0                    | 1.3                      | 0.2                       | 1.5                     |
| <i>Campylobacter faecalis</i>         | 1.0                    | 1.1                      | 0.9                       | 0.8                     |
| <i>Escherichia albertii</i>           | 0.9                    | 2.7                      | 0.02                      | 0.01                    |
| <i>Porphyromonas canis</i>            | 0.9                    | 0.5                      | 1.0                       | 1.1                     |
| <i>Peptoniphilus coxii</i>            | 0.7                    | 0.4                      | 0.8                       | 0.9                     |
| <i>Escherichia coli</i>               | 0.7                    | 2.0                      | 0.01                      | 0.01                    |
| <i>Candidatus Blochmannia rufipes</i> | 0.7                    | 0.8                      | 0.7                       | 0.4                     |
| <i>Bacteroides zoogloformans</i>      | 0.7                    | <b>0.3<sup>a,A</sup></b> | <b>1.0<sup>b</sup></b>    | 0.7 <sup>B</sup>        |
| <i>Mycoplasma canadense</i>           | 0.6                    | 1.7                      | 0.05                      | 0.2                     |
| <i>Prevotella buccalis</i>            | 0.5                    | 0.3                      | 0.8                       | 0.4                     |
| <i>Porphyromonas somerae</i>          | 0.5                    | 0.7                      | 0.6                       | 0.2                     |
| <i>Peptoniphilus indolicus</i>        | 0.5                    | 1.0                      | 0.2                       | 0.3                     |
| <i>Prevotella amnii</i>               | 0.4                    | 0.2 <sup>a,b</sup>       | <b>0.1<sup>a</sup></b>    | <b>1.0<sup>b</sup></b>  |
| <i>Veillonella magna</i>              | 0.4                    | 0.4                      | 0.4                       | 0.4                     |
| <i>Prevotella albensis</i>            | 0.4                    | <b>0.6<sup>a</sup></b>   | <b>0.04<sup>b,B</sup></b> | 0.5 <sup>A</sup>        |
| <i>Peptostreptococcus anaerobius</i>  | 0.4                    | 0.3                      | 0.3                       | 0.5                     |
| <i>Porphyromonas endodontalis</i>     | 0.4                    | 0.04                     | 0.01                      | 1.0                     |
| <i>Trueperella pyogenes</i>           | 0.3                    | 0.1                      | 0.3                       | 0.6                     |
| <i>Campylobacter mucosalis</i>        | 0.3                    | 0.8                      | 0.2                       | 0.1                     |
| <i>Prevotella paludivivens</i>        | 0.3                    | 0.4 <sup>a,b</sup>       | <b>0.05<sup>a</sup></b>   | <b>0.6<sup>b</sup></b>  |

<sup>a,b</sup>Superscripts within a row are significantly different;  $P \leq 0.05$ . <sup>A,B</sup>Superscripts within a row tend to differ;  $0.05 < P < 0.10$ .
